# Supplementary material for: Pre-analytical considerations in the development of a prototype SARS-CoV-2 antigen ARCHITECT automated immunoassay
Source: publisher site journal article supplement (doi:10.1515/cclm-2022-1292), 2023-02-17
Supplement: Supplementary file 1 [file j_cclm-2022-1292_suppl.docx]

**Supplemental Materials**

**Supplemental Table 1:** Drug interference with the prototype SARS-CoV-2 antigen ARCHITECT immunoassay

| **Active Ingredient** | **Mean S/C** | | | | **2-sided 95% CI** | | |
| --- | --- | --- | --- | --- | --- | --- | --- |
| **NEG SMP (w/o Drug)** | **NEG SMP (w/ Drug)** | **POS SMP (w/o Drug)** | **POS SMP (w/ Drug)** | **NEG SMP (Upper Limit)** | **POS SMP (Lower Limit)** | |
| Menthol/benzocaine | 0.06 | 0.07 | 2.21 | 2.36 | 0.01 | 0.4 | |
| Sodium chloride | 0.06 | 0.06 | 2.08 | 2.27 | 0.00 | 6.9 | |
| Phenylephrine hydrochloride | 0.06 | 0.06 | 2.36 | 2.16 | 0.00 | -10.7 | |
| Oxymetazoline | 0.06 | 0.06 | 2.07 | 2.41 | 0.00 | 13.4 | |
| Cromolyn sodium | 0.06 | 0.06 | 2.29 | 2.34 | 0.00 | -0.2 | |
| Zincum gluconium | 0.06 | 0.07 | 2.31 | 2.15 | 0.01 | -8.4 | |
| Alkalol | 0.06 | 0.05 | 2.20 | 2.13 | -0.01 | -4.7 | |
| Fluticasone furoate | 0.06 | 0.07 | 2.22 | 2.18 | 0.01 | -3.6 | |
| Phenol | 0.06 | 0.05 | 2.29 | 2.07 | -0.01 | -11.5 | |
| Tobramycin | 0.06 | 0.06 | 2.03 | 2.17 | 0.00 | -5.6 | |
| Mupirocin | 0.06 | 0.07 | 2.23 | 2.03 | 0.01 | -10.7 | |
| Oseltamivir phosphate | 0.06 | 0.06 | 2.19 | 2.31 | 0.00 | 4.8 | |
| NEG SMP, negative specimen pool + BD UTM + inactivator; POS SMP, positive specimen pool + BD UTM + inactivator (~10k RLUs); S/C, signal-to-cutoff ratio.  Cutoff specimen was calibrator diluent at 6.5 pg/mL (~5k RLUs). | | | | | | |

**Supplemental Table 2:** Long-term storage (90 days) of positive specimens at -20°C does not affect detection by prototype SARS-CoV-2 antigen ARCHITECT immunoassay

| Specimen | Baseline S/C | Day 90 S/C | S/C % Difference |
| --- | --- | --- | --- |
| 1 | 30.5 | 30.6 | 0.0 |
| 2 | 419.2 | 457.7 | 9.2 |
| 3 | 2.3 | 2.2 | -4.3 |
| 4 | 8.0 | 8.6 | 7.5 |
| 5 | 101.8 | 99.0 | -2.8 |
| 6 | 9.3 | 9.5 | 2.2 |
| 7 | 78.5 | 82.4 | 5.0 |
| S/C, signal-to-cutoff ratio. | | | |

**Supplemental Table 3:** Clinical performance of the prototype SARS-CoV-2 antigen ARCHITECT immunoassay compared to the Roche Elecsys SARS-CoV-2 Ag immunoassay for nasopharyngeal specimens (see also Figure 3) [7]

|  | Abbott ARCHITECT | | | | | Roche Elecsys | | |
| --- | --- | --- | --- | --- | --- | --- | --- | --- |
|  |  | Instrument 1 | | Instrument 2 | | Cobas | | |
| Ct | N | Reactive (n) | Sensitivity (%) | Reactive (n) | Sensitivity (%) | N | Reactive (n) | Sensitivity (%) |
| <26 | 88 | 87 | 98.86 | 87 | 98.86 | 163 | 163 | 100.00 |
| <27 | 90 | 89 | 98.89 | 89 | 98.89 | 178 | 177 | 99.40 |
| <28 | 100 | 96 | 96.00 | 95 | 95.00 | 189 | 185 | 97.90 |
| <29 | 107 | 103 | 96.26 | 101 | 94.39 | 204 | 198 | 97.10 |
| <30 | 113 | 106 | 93.81 | 103 | 91.15 | 226 | 209 | 92.50 |
| <31 | 119 | 107 | 89.92 | 104 | 87.40 | 243 | 221 | 90.90 |
| <32 | 125 | 108 | 86.40 | 105 | 84.00 | 258 | 224 | 86.80 |
| <33 | 127 | 108 | 85.04 | 105 | 82.68 | 270 | 229 | 84.80 |
| <34 | 131 | 108 | 82.44 | 105 | 80.15 | 288 | 234 | 81.30 |
| <35 | 142 | 109 | 76.76 | 106 | 74.65 | 308 | 235 | 76.30 |
| Overall | 150 | 109 | 72.67 | 106 | 70.67 | 390 | 236 | 60.50 |

**Supplemental Figure 1:** Loss of S/C over time in specimens stored at 5°C or room temperature is similar for the prototype SARS-CoV-2 antigen immunoassay run on the ARCHITECT instrument and the Access SARS-CoV-2 Antigen Assay run on the Beckman Access 2 instrument. (A) rAg spiked in negative patient specimen matrix or (B,C) positive patient specimens at 1X, 4X, or 50X S/C (based on S/C of calibrator diluent of 6.5 RLUs) were stored for the indicated times and at the indicated temperatures, and run on the ARCHITECT (solid lines) or Beckman Access 2 (dashed lines).


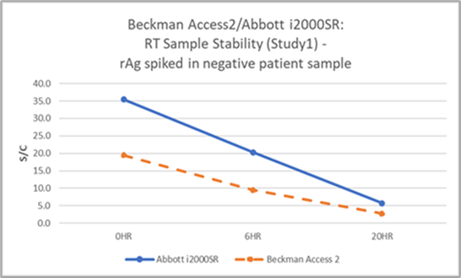


**A**


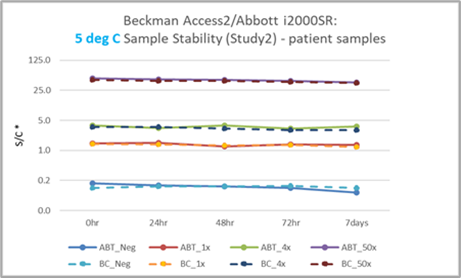

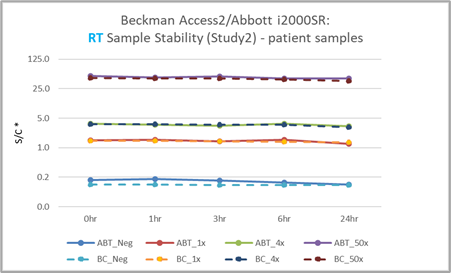


**C**

**B**

**Supplemental Figure 2:** Stability of individual and pooled positive patient nasal and nasopharyngeal specimens in UTM handled and stored under various conditions. Specimens were inactivated before or after storage at 2-5°C or -80°C. Frozen samples were thawed and all samples were stored at room temperature (15-30°C) for up to 24 hours, then assayed on the prototype SARS-CoV-2 antigen ARCHITECT immunoassay. (A) S/C % difference from baseline, with a loss of 20% indicating instability (red line). (B) S/C at each indicated RT storage timepoint and condition, with S/C ≥1.00 indicating a positive result. F/T, freeze/thaw; S/C signal-to-cutoff ratio.

**A**

**B**


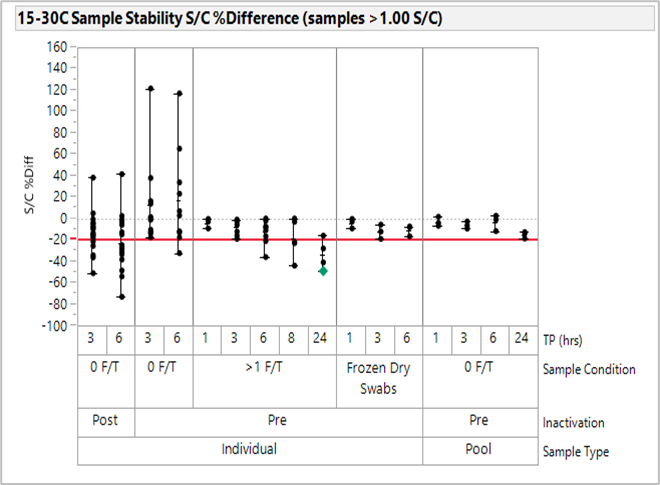
**
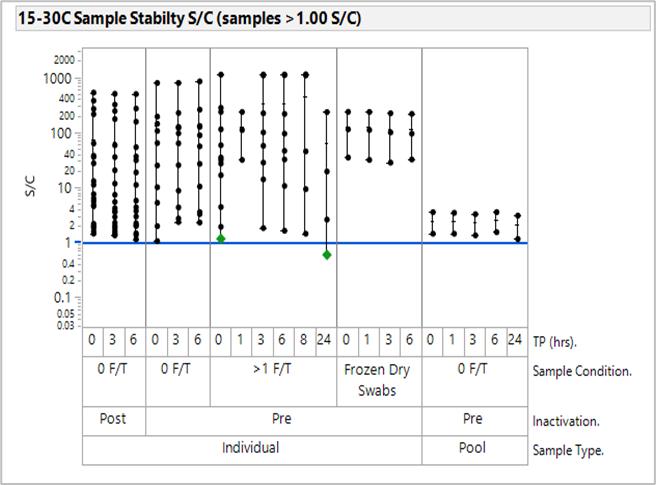
**

**Supplemental Figure 3:** Clinical performance of the prototype SARS-CoV-2 antigen ARCHITECT immunoassay run on two ARCHITECT instruments. Negative and positive patient nasopharyngeal specimens with known viral loads as reported by the vendor (Cerba Research; using the PerkinElmer® SARS-CoV-2 Real-time RT-PCR Assay run on the BioRad CFX384 instrument) were tested in duplicate across two ARCHITECT i2000SR instruments using three calibrator lots.


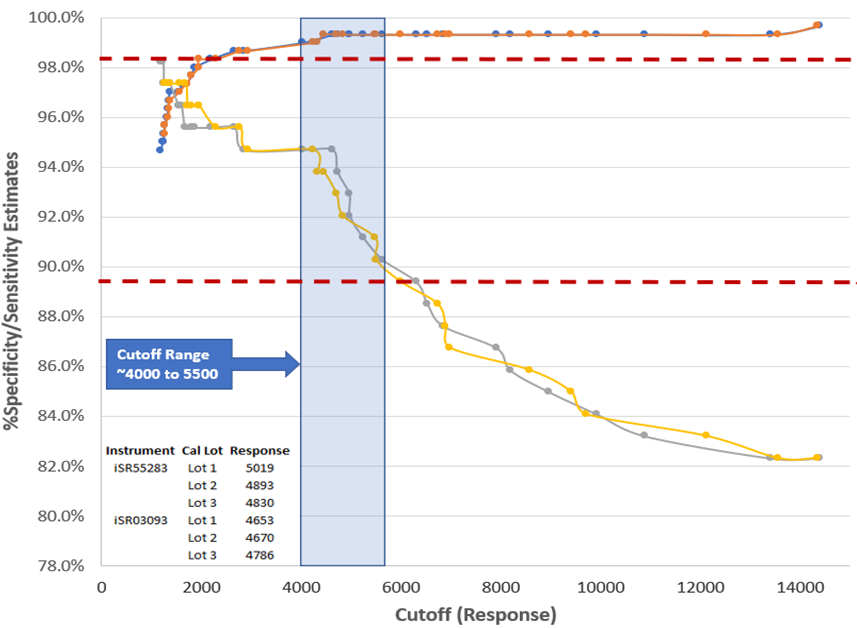


ARCHITECT Instrument 1

ARCHITECT Instrument 2

Sensitivity ≥89.5%

Specificity ≥98.5%
